# Supplementary material
Source: PubMed Central journal article supplement (PMC1533306)
Supplement: bj3970491add.pdf [file bj3970491add.pdf]

**Supplementary Table 1: PCR conditions**

|                                                          | <b>Final concentration</b>                                                         | <b>DNA-Polymerase</b>              | <b>Hot-Start</b> | <b>Initial denaturation</b> | <b>Number of cycles</b> | <b>Temperature cycling</b>              |  | <b>Final extension</b> |  | <b>PCR product</b>                                |
|----------------------------------------------------------|------------------------------------------------------------------------------------|------------------------------------|------------------|-----------------------------|-------------------------|-----------------------------------------|--|------------------------|--|---------------------------------------------------|
| Standard PCR                                             | 1X <i>Taq</i> buffer<br>0.18 mM dNTPs<br>0.4 μM primer<br>1.5 mM MgCl <sub>2</sub> | <i>Taq</i> DNA Polymerase<br>[3 U] | No               | 95 °C 4 min                 | 30                      | 95 °C 40 s<br>52 °C 40 s<br>72 °C 60 s  |  | 72 °C 5 min            |  | ~ 450 bp                                          |
| RACE-PCR<br>“Touch Down”                                 | 1X <i>Taq</i> buffer<br>0.18 mM dNTPs<br>0.4 μM primer<br>1.5 mM MgCl <sub>2</sub> | <i>Taq</i> DNA Polymerase<br>[3 U] | No               | 95 °C 4 min                 | 5                       | 95 °C 40 s<br>62 °C 40 s<br>72 °C 60 s  |  | 72 °C 5 min            |  | N-terminal<br>~ 1250 bp<br>C-terminal<br>~ 800 bp |
|                                                          |                                                                                    |                                    |                  |                             | 10                      | 95 °C 40 s<br>60 °C 40 s<br>72 °C 60 s  |  |                        |  |                                                   |
|                                                          |                                                                                    |                                    |                  |                             | 25                      | 95 °C 40 s<br>58 °C 40 s<br>72 °C 60 s  |  |                        |  |                                                   |
|                                                          |                                                                                    |                                    |                  |                             | 5                       | 95 °C 40 s<br>62 °C 40 s<br>72 °C 240 s |  |                        |  |                                                   |
| Amplification of the <i>ScTPase</i> gene<br>“Touch Down” | 1X <i>Pfu</i> buffer with MgSO <sub>4</sub><br>0.18 mM dNTPs<br>0.4 μM primer      | <i>Pfu</i> DNA Polymerase<br>[3 U] | No               | 95 °C 4 min                 | 10                      | 95 °C 40 s<br>60 °C 40 s<br>72 °C 240 s |  | 72 °C 5 min            |  | 2229 bp                                           |
|                                                          |                                                                                    |                                    |                  |                             | 25                      | 95 °C 40 s<br>58 °C 40 s<br>72 °C 60 s  |  |                        |  |                                                   |
|                                                          |                                                                                    |                                    |                  |                             | 4                       | 95 °C 50 s<br>60 °C 50 s<br>72 °C 720 s |  |                        |  |                                                   |
|                                                          |                                                                                    |                                    |                  |                             | 18                      | 95 °C 50 s<br>60 °C 50 s<br>72 °C 720 s |  |                        |  |                                                   |
| Two-Stage PCR                                            | 1X <i>Pfu</i> buffer with MgSO <sub>4</sub><br>0.2 mM dNTPs<br>0.3 μM primer       | <i>Pfu</i> DNA Polymerase<br>[3 U] | No               | 95 °C 1 min                 | 4                       | 95 °C 50 s<br>60 °C 50 s<br>72 °C 720 s |  | 72 °C 7 min            |  | 5644 bp                                           |
|                                                          |                                                                                    |                                    |                  | 95 °C 1 min                 | 18                      | 95 °C 50 s<br>60 °C 50 s<br>72 °C 720 s |  | 72 °C 7 min            |  |                                                   |

**Supplementary Table 2: Detailed summary of the purification of recombinant *Sc*TPase.**

All steps were carried out at 6 °C, enzyme activities and protein concentrations indicated were measured after concentrating steps.

| Step                   | Total volume [ml] | Total activity [U] | Total protein [mg] | Specific activity [U/mg] | Yield [%] | Purification [-fold] |
|------------------------|-------------------|--------------------|--------------------|--------------------------|-----------|----------------------|
| Crude cell extract     | 15                | 302.6              | 445.0              | 0.68                     | 100       | 1.0                  |
| Anion-exchange         | 10                | 204.7              | 53.6               | 3.82                     | 68        | 5.6                  |
| HiPrep 26/10 Desalting | 10                | 132.7              | 26.9               | 4.93                     | 44        | 7.3                  |
| Hydroxylapatite        | 5                 | 94.9               | 15.1               | 6.3                      | 32        | 9.3                  |

```

GfTPase : -MAPPHQFOSKPSDVIRRRLLSSAVSSK--RP---NTPG--YTLSTPMWAGIAGAVVNNNTQFEVAISHDSVYNTDFASSVVFYSPNEPEAQAGITEKHVLETLRKFSTEHMCKFLGAGVTVLLREAQFNLCRLW : 128
PsTPase : MSTPHHQFESKSSSTAIRRRLLSSSVSSKQRP---NIMTTTTFASLTPMWAGVAGTLVNNNTQYEIAVTVHDGVYSTDFASVIEVTPGFTVKNKSDIEAQVLLNLRKFSAEHLCKFLGAGITLALLKEQFNLCRLW : 132
ScTPase : -MSPPHGFSVPESTAAARRRLSSKASLTNRPTFTKLTITQIYASLTPMWAGIAGAPINNGSQFELAISVHDSVYSTDFASFVIDHTPLDPEKAAAKEIEKHVLDALRKFSCQEHLCCKFLGAGITLALLRESFNICTRLW : 134

GfTPase : LDMDIVPIVFNPKPFHTDSITRPNVHRHRSSTTGSYVPSGAEETPTVYVYDPAQLQDFENKLSANVQTRLPVPTVDEQADSAARKCICYFGPCNNPRLQIGPRNOVAVDAGGKIHLIDDIIEYRKTIVGKCTWNSVTK : 263
PsTPase : LDMDIVPIVFNPKPFHTDSVTRPNIKHRISSTTGSYVPSGSEETPTVYVEASHLGDPSHLSFNAAQKLPVPTVDEQADSAARKCLMYFGPNNPRLSIGARNEVTVDAGGKIHLIDDIIEYRMTVCACTWNAVTK : 267
ScTPase : LDDLIVPIVFNPKPFHTDSLTRPNIKHRISSTTGSYVPSGAEETPTVYVEASHLGN--NLSAGTASKLPVPTVDEQADSAARKAIMYFGPNNPRLTIGPRNOVAVDAGGKIHLIDDIIEYRKTIVGKSTWNAVTK : 267

GfTPase : LADELREKRIKIGFFSSTPQGGVALMRHAIIRFETALDVAAWYVNPSPSVFRTTKNNHNILQGVADPSLRRLTKEADNFDSWILKNGLRWTAEGGPLAPGGVDIAFIDDPQMPGLIPLIKRIRPDLPIIYRS : 398
PsTPase : LADELREKVKIGFFSSTPQGGVALMRHALIRFETALDVDVAWYVNPSPQVFRRTTKNNHNILQGVAAAPDLRLTQEAKDADFDAWILKNGLRWTAEGGPLAPGGVDVVFIDDPQMPGLIPLIKKVRPEVPIVYRS : 402
ScTPase : LADELRERCIKIGFFSSTPQGGVALMRHALIRFETALDVAAWYVNPSPSVFRTTKNNHNILQGVASPDRLRLTQEAKDNFDAWITKNGLRWTAEGGPLAPGGVDIAFIDDPQMPGLIPLIKKVRPELPIIYRS : 402

GfTPase : HIEIRSDLVHVKGSFQEEVWNYLWNNIQHSDLFISHPVNKFVPSDVPLEKLALLCAATDWLDGLSKHLDAWDSOYYMGEFR-----NLCVKEKMNELGWPAREYTVQIARFDPKIGIPNVIDSYARFR : 521
PsTPase : HIEIRNDLVHVAWSFQEEVWNYLWNNIQLADLFISHPVSKFVPSDVPLEKLALLCAATDWLDGLNKDLDPWDSPFYMGFRPRGSHLNRGEFRSLCAKEKMHLELNWPARDYTVQVARFDPKIGIPNVVDSYKFR : 537
ScTPase : HIEIRSDLVHIAGSFQEEVWNYLWNNIQLADLFISHPVKAFVPEVPIERVALLPAAATDWLDGLNRELSDWDRQYYMGEFR-----ALCQKDKMNTLDWENREYCTQIARFDPKIGIPNVIDSYARFR : 525

GfTPase : KLCVDK---VMEDDTPQLLLCGHGAVDDPDASIIYDQVLLIHK--YKEYAPDIVVMRCPPSDQLLNTLMANAKFALQQLSTREGFEVKVSEALHAGKPVIACTRGGIPLQIEHGKSGYLCPEGDNAAVAQHMLDL : 652
PsTPase : NLLRTRSPMDSEHPQLLLCGHGAVDDPDASIIYDQIMLVNSDPYKEYAHDIVVMRIPPSDELLNAMMANSRIALQQLSTREGFEVKVSEALHTGKPVIACTRGGIPLQIQHGKSGYLTPGKDAVAGHEVDF : 672
ScTPase : RLLEAG-DVDADDQFQLLLCGHGAVDDPDASIIYDQVLLIHEK--YAEFAKDIVVMRIPPSDQLLCLMANARIALQQLSTREGFEVKVSEAVHAGKPIAATGGIPLQVEHGKSGFLTEPGDNAQVARHMYDL : 658

GfTPase : YTDEDLYDTMSEYARTHVSDEVGTVGNAAAWMLAVMYVSRGVKLRPHGAWINDLMRTEMGEPYRPGEPRLPRGELHVG----- : 732
PsTPase : YTDEALYRKMSEFARTHVSNEVGTVGNAAAWLYLAVMYSRGEKIKPNGAWINDFFREETGEPYKGETKLPRTKLDMQ----- : 751
ScTPase : YTDVALYDRMSQYARTHVSDEVGTVGNAAAWLYLAAVYTRGOKLAPKGAWLNDLIREETGTPYVEGEPRLPRGGIKVQD----- : 737

```

**Supplementary Figure 1:** Sequence comparison of fungal trehalose phosphorylases from *Grifola frondosa* (GfTPase, acc. no. BAA31350), *Pleurotus sajor-caju* (PsTPase, acc. no. AAF22230) and *Schizophyllum commune* (ScTPase, acc. no. ABC84380) was performed with Vector NTI program using blosum62mt2 scoring matrix and standard settings. Amino acids conserved are shaded in black. The primary structure of ScTPase is 76.7% and 73.0% identical to the sequences of GfTPase and PsTPase, respectively.

*AtGS* ----- : -  
*OtsA* ----- : -  
*EcMalP* ----- : -  
*ScTPase* MSPPHGFSSVPSTAARRRLSSKASLTNRPTFTKITTQTYASLTPMWAGIAGAPINNGSQFELAISVHDSVYSTDFASFVIDHTPLDPEKAAKEIEKHVLDALRKFSQEHL : 110

*AtGS* ----- : -  
*OtsA* ----- : -  
*EcMalP* -----MSQPIFNDKQFQEALSQRQWQRYGLNSAAEMTPRQWWLAVSEALAEM : 46  
*ScTPase* CKFLGAGITLALLRESPNICTRLWLDLDIVP IVFNKPFHTDSLTRPNIKHRISSTSGSYVPSGAETPTVYVEASHLGNNLSAGTASKLP IPRTLDEQADSAARKAIMYY : 220

*AtGS* -----MNVLVSSEIYPL---IKTGGLADVVGALPIAL-----E : 31  
*OtsA* -----SRLVVVSNRIAPPDEHAASAAGGLAVGILGALKAAGGLWFGWSGETGNEDQPLKK : 54  
*EcMalP* LRAQPFAPVANQRHVNYISMEFLIGRL-----TGNNLLNLGWYQDVQDSLKAYDINLTDLLEEIDPALGNCGGLGRLAACFLDSMATVQGSATGYGLNYQYGLFR : 147  
*ScTPase* GPNNNPRLTIGPRNQVAVDAGGKIHLDDIDEYRKTVPSTWTAVNKLADLRERQIKIGFFSST-----PQGGVALMRHALIRFF-----S : 303

*AtGS* A-----HGVTRRTLIPGYPAVKA AVTDPVKCFEFTDLLGEKADLLEVQHERLDLLILDAPA-----YY--- : 89  
*OtsA* V-----KKG NITWASFNLS-----EQDLDEYYNQFSNAVLWP--- : 86  
*EcMalP* QSFVDGKQVEAPDDWHRSNYPWFRHNEALDVQVGIGGKVTKDGRWEPEFTITGQAWDL-----PVG YRNGVAQ-----PLRLW : 221  
*ScTPase* A-----LDVDAAWYVPNPS-----PSVFRTTKNNH-----NI--- : 330

*AtGS* -----ERSGGPYLGQTGKDYDPDNWKRFAALS LAAARIGAGVLPGW-----RPDMVHAHDWQAAMTPVVMRYAETPEIP----- : 157  
*OtsA* -----AFHYRLDLVQFORPAWDGYLRVNALLADKLLPLLQ-----DDDIWIWHDYHL-LPFAHELKRGVNNR----- : 149  
*EcMalP* QATHAHPFDLTKFNDGDFLRAEQGINA EKLTKVLYPNDNHTAGKKLRLMQYFQCACSVADILRRHHLAGRKLHELADYEVIQINDTHP-TIAIPELLRVLIDEHQMSW : 330  
*ScTPase* -----LQGVASPDRLRTQEAKDNFDAWITKNGLRRTAEGGPLAPG-----GVDIAFIIDDPQM-PGLIPLIKKVRPELP----- : 397

*AtGS* -----SLLTIHNI AFQQFGANIFSKLALP-----AHAFGMGIEIYNDVS-----FLKGGQTATALSTVSPS- : 216  
*OtsA* -----IGFFLHIP-----FP-----TPEIFNALPTYDTLLE-----QLC-----DYDLLGFQTEN- : 189  
*EcMalP* DDAWAITSKTFAYTNHTL-----MPEALERWDVKLVKGLLPRHQI INEINTRFKTLVEKTWP GDEKVVAKLAVVHDKQVHMANLCVVGGFVAVNGVAALH : 425  
*ScTPase* -----IIYRSHIE-----IR-----SDLVHIAGSPQEEVWK-----YLWNNIQLADLFISHPVK- : 441

*AtGS* -YAE EILTA EFGMGLEGV-----IGSR-----AHVLHGIVNGIDADVWNPATDHLIHDNYSAANLK-----NRALNKK : 278  
*OtsA* -DRLAFLDCLSNLTRVTT RSAKSH TAWGK-----AFRTEVYPIGIEP-----KEIAKQAAG-----PL--PPK : 244  
*EcMalP* SDLVV-----KDLFPEYHQLWPNK FHNVTNGITPRRWIKQCNPALAALLDKSLQKEWANDLDQLINLEKFADDAKFRQQYREIKQANKVR--LAE : 513  
*ScTPase* -AFVP-----EDVP-----IERVALLPAATDWDLDGLNKELSDWRQYYMGEFR-----AL--CQK : 488

|         |                                                                                                                        |       |
|---------|------------------------------------------------------------------------------------------------------------------------|-------|
| AtGS    | AVA EHFRI---DDD GSPLFCVLSRLTWQKGGIDLMAEAVDEIVSLGG-----RLVVLGAG--DVALE-GALLAAASRH-----HGR--V-----GVAIGY                 | : 354 |
| OtsA    | LAQLKAE L---K--NVQNI FSVRLDY SKG LPERFLAYEALLEKYPQHH-----GKIRY TQIAPT SRGDVQAYQDIRHQLENEAGRINGKYGLGWTP L-----YYLNQH    | : 339 |
| EcMalP  | FVKV RTGIE INP--QAIFDIOIKRLEHEYK RQHLNLLLHILALYKEIRENPQ-ADRVPRVFLFGAKAAPGYLLA-KNII FAINKVA----DVINNDPL--VGDKLKV VFLPD  | : 613 |
| ScTPase | DKMNTLDW---P--NREYCIQ IARFDPAKGI PNVIDSYARFRRLLNEAGDVDADDQPLLICGHGAVDDPD A-SIIYDQVLT LI--HEKYAEFAKD--I-----VVMRLP      | : 583 |
|         |                                                                                                                        |       |
|         |                                                                                                                        |       |
| AtGS    | -NEPLSHLMQAGCD AIIIPSR--FEP CGITQLYALRYGCIPVVARTG----GLAD--TVIDANHAALASKAATGVQFSPVTL DGLKQAI RRTVRY YHDPK LWTQM QKLG M | : 455 |
| OtsA    | FDRKLLMKIFRYSDVGLVTP L--RDGMNLVAK EYVAAQDPANPGVLV----LSQFAGAANELT-----SALIVN PYDRDEVAAALDRAL TMSLAERISRHAEMLDV         | : 434 |
| EcMalP  | YCVSAAEK LIPAADISEQI STAGKEASGTGNM KKLALNGALT VGTLDGANVEIAEK--VGEENI-----FIFGH TVEVKAILAKGYDPVKRKKGKVLD AVLKELESQ      | : 712 |
| ScTPase | PSDQLLDCLMANARIALQLST--REGFEVKVSEAVHAGKPIIAATTG----GIPL--QVEHGK-----SGFLTEPGDNAQVARHMYDLYTDVALYDRMSQYARTHV             | : 676 |
|         |                                                                                                                        |       |
|         |                                                                                                                        |       |
| AtGS    | KSDVSW EKSAGLYAALYSQLISKGH-----                                                                                        | : 480 |
| OtsA    | IVKNDINH WQECFISDLKQIVPRSAESQQRDKVATFPKLA-----                                                                         | : 474 |
| EcMalP  | GKYSDGDKHAFDQMLHSIGKQGGDPYLVMADFAAYVEAQKQ--WVDVLYRDQEAWTRAAI LNTARCGMFS SDRSIRDYQARIWQAKR                              | : 797 |
| ScTPase | SDEVGTVGNAAAWLYLAAVYTRGQKLAPKGAWLNDLLREETGTPYVEGEPRLPRGGIKVQD-----                                                     | : 737 |
|         |                                                                                                                        |       |

**Supplementary Figure 2:** Full-length multiple sequence alignment of primary structures of *ScTPase* (acc. no. ABC84380, GT 4) and retaining glycosyltransferases of fold family GT-B including glycogen synthase from *Agrobacterium tumefaciens* (*AtGS*, acc. no. AAD034474, GT 5), trehalose 6-phosphate synthase from *E. coli* (*OtsA*, acc. no. BAA15717, GT 20) and maltodextrin phosphorylase from *E. coli* (*EcMalP*, acc. no. AAC76442, GT 35). Conserved regions surrounding catalytic centre residues are shaded. The predicted secondary structural elements for *ScTPase* are shown as black cylinders for  $\alpha$ -helices and arrows for  $\beta$ -sheets. Secondary structure prediction was made with the public PSIPRED server (<http://bioinf.cs.ucl.ac.uk/psipred/>) using mGenTHREADER method.
